# Supplementary material for: The noninvasive echocardiographic assessment of right ventricular myocardial work in a healthy population
Source: Research Square preprint supplement (doi:10.21203/rs.3.rs-1633505/v1), 2022-05-13
Supplement: Supplementary file 1 [file 1eab5ec392f837844f908347.docx]

Table 3 Parameters of myocardial work and pulmonary artery pressure values according to gender and age

40–50 years (n= 61) ?50 years (n= 36) *p*-value Men Women

Men (n= 19), Women (n= 42), Men (n= 12), Women (n= 24),

mean ± SD or mean ± SD or mean ± SD or mean ± SD or

median (IQR) median (IQR) median (IQR) median (IQR) Men Women *R p*-value *R p*-value

| 21 (18, 25) | 23 (20, 25) | 23 (20, 26) | 25 (19, 27)‡ | 0.334 | 0.008 | 0.147 | 0.144 | 0.247 | 0.001 |
| --- | --- | --- | --- | --- | --- | --- | --- | --- | --- |
| 12 ± 2 | 14 ± 2* | 14 ± 2 | 14 ± 3 | 0.359 | 0.225 | 0.063 | 0.534 | 0.124 | 0.115 |
| 250 (212, 309) | 336 (269, 381)* | 314 (267, 346) | 336 (258, 430) | 0.131 | 0.563 | 0.132 | 0.189 | 0.068 | 0.387 |
| 313 ± 53 | 395 ± 79* | 377 ± 50†‡# | 403 ± 100 | 0.038 | 0.189 | 0.185 | 0.065 | 0.14 | 0.074 |
| 27 (18, 32) | 30 (14, 46)§ | 28 (25, 32) | 27 (11, 50)† | 0.109 | <0.0001 | 0.212 | 0.034 | 0.334 | <0.0001 |
| 91 (89, 95) | 92 (88, 95) | 92 (91, 93) | 92 (89, 96) | 0.816 | 0.053 | -0.038 | 0.704 | -0.235 | 0.003 |

IQR, interquartile range; PADP, pulmonary artery diastolic pressure; PASP, systolic pulmonary artery pressure; RV, right ventricular; RVGCW, RV global constructive work; RVGWE, RV global work efficiency; RVGWI, RV global work index; RVGWW, RV global wasted work; SD, standard deviation. *P-value < 0.05 vs. men. †Significant difference between <30 years of age and ?50 years of age. ‡Significant difference between 30 to 40 years of age and ?50 years of age. #Significant difference between 40 to 50 years of age and ?50 years of age. §Significant difference between <30 years of age and 40 to 50 years of age.
